# Supplementary material for: Combining random walk and regression models to understand solvation in multi-component solvent systems
Source: Royal Society of Chemistry journal article supplement (doi:10.1039/c7cp02873c), 2017-01-01
Supplement: c7cp02873c1.pdf [file c7cp02873c1.pdf]

# Combining random walk and regression models to understand solvation in multi-component solvent systems (Electronic Supplementary Information)

Ella M. Gale,<sup>\*,‡<sup>a,c</sup></sup> Marcus A. Johns,<sup>‡<sup>b,d</sup></sup> Remigius H. Wirawan<sup>a,d</sup> and Janet L. Scott<sup>a</sup>

‡: These authors contributed equally to this work.

E-mail: ella.gale@bath.ac.uk, m.a.johns@bath.ac.uk.

<sup>a</sup>Department of Chemistry, University of Bath, Claverton Down, Bath, BA2 7AY, UK.

<sup>b</sup>Department of Chemical Engineering, University of Bath

<sup>c</sup> Current Address: School of Experimental Psychology, University of Bristol,  
12a Priory Road, Bristol, BS8 1TU, UK; E-mail: ella.gale@bristol.ac.uk

<sup>d</sup> EPSRC Doctoral Training Centre for Sustainable Chemical Technology  
at the University of Bath

## S1 Supplementary Information

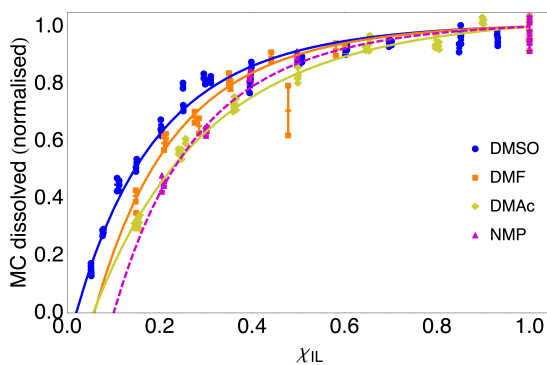

Figure S1: Typical dissolution profiles for selected organic electrolyte solutions (OES)s. Points are experimental data measured in pairs of over- and under-estimates of the maximum cellulose dissolvable, the lines are the 1-D random walk fits.

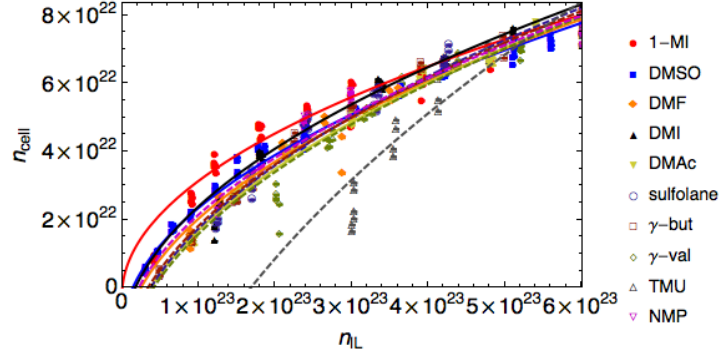

Figure S2: Number of cellobiose residues of cellulose,  $n_{cell}$  molecules (taken from molar fraction data) in a mole of mixture against the number of IL pairs. The fit is  $n_{cell} = d + \sqrt{m n_{IL}}$ . Points are experimental data measured in pairs of over- and under-estimates of the maximum cellulose dissolvable, the lines are the 1-D random walk fits.

Table S1: Coefficients for the  $n_{cell} vs n_{IL}$  fits. The equation used was:  $n_{cell} = d + m\sqrt{n_{IL}}$ . The norm of the residuals is given by  $R^2$ .

| Dataset       | d                         | m                        | $R^2$    |
|---------------|---------------------------|--------------------------|----------|
| 1-MI          | $-2.27001 \times 10^{21}$ | $1.06328 \times 10^{11}$ | 0.994499 |
| DMSO          | $-1.40183 \times 10^{22}$ | $1.18428 \times 10^{11}$ | 0.997986 |
| DMF           | $-2.01097 \times 10^{22}$ | $1.27692 \times 10^{11}$ | 0.997576 |
| DMI           | $-1.70546 \times 10^{22}$ | $1.29415 \times 10^{11}$ | 0.998327 |
| DMAc          | $-2.65143 \times 10^{22}$ | $1.37092 \times 10^{11}$ | 0.998610 |
| sulfolane     | $-2.73645 \times 10^{22}$ | $1.41466 \times 10^{11}$ | 0.996042 |
| $\gamma$ -but | $-2.53112 \times 10^{22}$ | $1.37517 \times 10^{11}$ | 0.996956 |
| $\gamma$ -val | $-2.82255 \times 10^{22}$ | $1.39164 \times 10^{11}$ | 0.998441 |
| TMU           | $-9.44975 \times 10^{22}$ | $2.30376 \times 10^{11}$ | 0.985068 |
| NMP           | $-1.88558 \times 10^{22}$ | $1.27419 \times 10^{11}$ | 0.995587 |

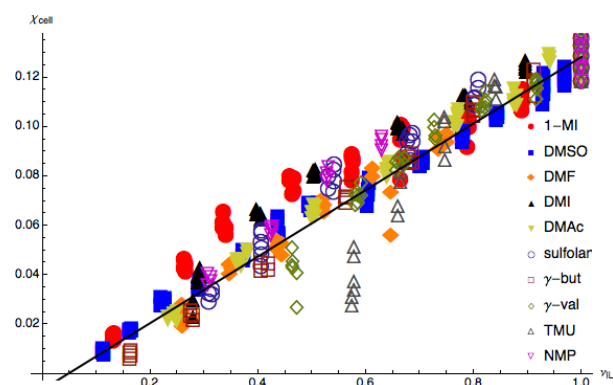

Figure S3: Molar fraction of cellobiose residues in dissolved cellulose versus volume fraction of ionic liquid (as calculated from molar volumes and molar fractions). The amount of cellulose dissolvable in a solution mixture is only related to the volume of IL available suggesting that a space-filling model of dissolution works. Fitted line equation given in Table 2 of the paper.

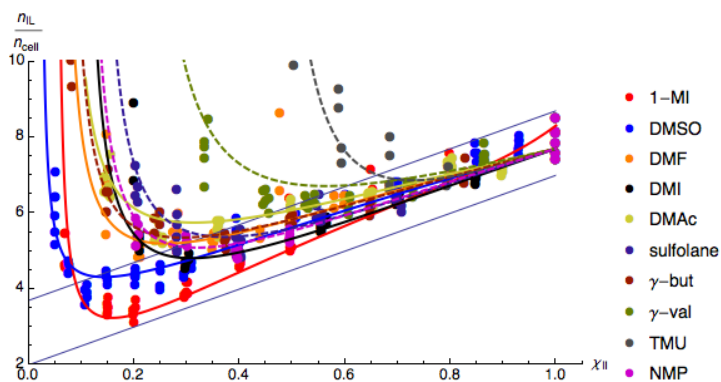

Figure S4: The number of ionic liquid pairs per cellobiose residue. Upper and lower boundaries (blue lines) are drawn at  $n_{IL}/n_{cell} = 1.8 + 1.5\chi_{IL}$  and  $n_{IL}/n_{cell} = 3.7 + 1.5\chi_{IL}$ .

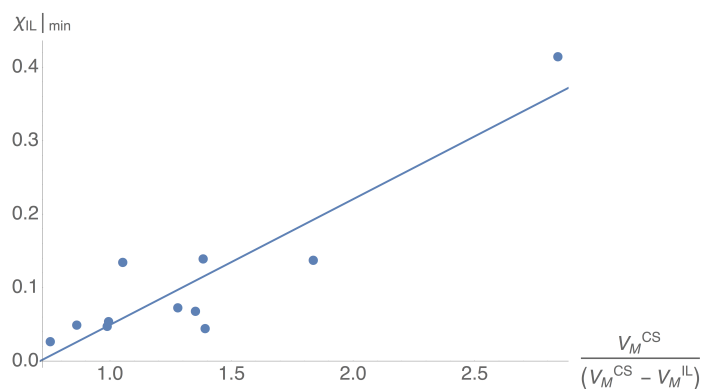

Figure S5: Linear fit of minimum  $\chi_{IL}$  to linearized CS molar volume.

Table S2: Molar volumes of tested co-solvents and ionic liquid.

| Name                                | Key           | Molar volume<br>$\text{cm}^3\text{mol}^{-1}$ |
|-------------------------------------|---------------|----------------------------------------------|
| 1-methylimidazole                   | 1-MI          | 82.4                                         |
| dimethylsulfoxide                   | DMSO          | 71.3                                         |
| n,n-dimethylformamide               | DMF           | 82.628                                       |
| 1,3-dimethylimidazolidin-2-one      | DMI           | 107.3                                        |
| n,n-dimethylacetamide               | DMAc          | 93.02                                        |
| sulfolane                           | Sulfolane     | 95.27                                        |
| gamma-B542a-butyrolactone           | $\gamma$ -But | 76.8                                         |
| gamma-valerolactone                 | $\gamma$ -Val | 96.2                                         |
| 1,1,3,3-tetramethylurea             | TMU           | 122.6                                        |
| n-methylpyrrolidine-2-one           | NMP           | 96.44                                        |
| 1-Ethyl-3-methylimidazolium acetate | [EMim][OAc]   | 165.735                                      |

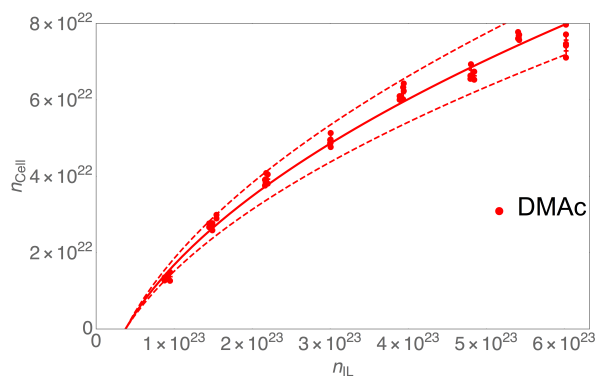

Figure S6: Sensitivity of the random walk model parameters. An example fitted model for DMAc is plotted with equations containing  $\pm 10\%$  of the fitted values. A small change in model parameters causes a small change in the model predictions

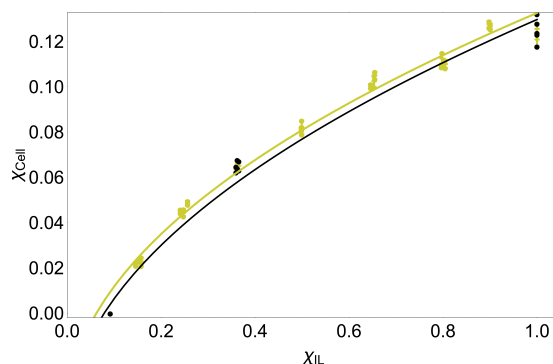

Figure S7: Using the random walk model for prediction of DMAc OES data. Yellow: fit (line) to all measured data (dots). Black: fit (line) to subset points (black dots). Only the measurement at around  $\chi_{IL} = 0.35$  needs to be measured, the point at  $\chi_{IL} = 1$  is known and the point at  $\chi_{cell} = 0$  can be estimated from equation 8. The single measurement fit differs from the actual data by only 7.1% on average.

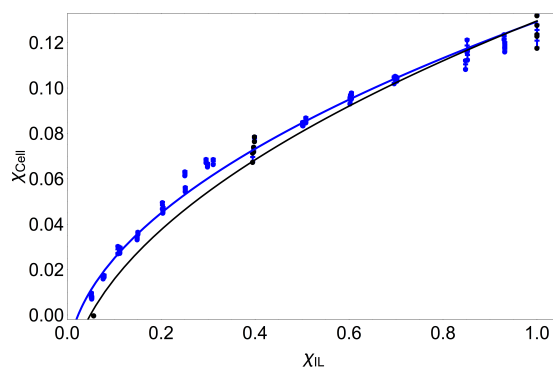

Figure S8: Using the random walk model for prediction of DMSO OES data. Blue: data (dotss) and fit (line) to all measured data. Black: fit (line) to measured or estimated points (dots). Only the measurement at around  $\chi_{IL} = 0.4$  needs to be measured, the point at  $\chi_{IL} = 1$  is known and the point at  $\chi_{cell} = 0$  can be estimated from equation 8. The single measurement fit differs from the actual data by only 9.4% on average.
